# Supplementary material for: A generic pixel-to-point comparison for simulated large-scale ecosystem properties and ground-based observations: an example from the Amazon region
Source: Copernicus journal article supplement (doi:10.5194/gmd-2018-182), 2018-07-27
Supplement: Supplementary file [file gmd-2018-182-AC1-supplement.pdf]

**Response to Executive Editor Comment:**

Dear authors,

In my role as Executive editor of GMD, I would like remind you of our Editorial, which states that "All papers must include a section, at the end of the paper, entitled 'Code availability'. Here, either instructions for obtaining the code, or the reasons why the code is not available should be clearly stated. It is preferred for the code to be uploaded as a supplement or to be made available at a data repository with an associated DOI (digital object identifier) for the exact model version described in the paper. Alternatively, for established models, there may be an existing means of accessing the code through a particular system. In this case, there must exist a means of permanently accessing the precise model version described in the paper. In some cases, authors may prefer to put models on their own website, or to act as a point of contact for obtaining the code. Given the impermanence of websites and email addresses, this is not encouraged, and authors should consider improving the availability with a more permanent arrangement. After the paper is accepted the model archive should be updated to include a link to the GMD paper." Thus please add for all used models explicitly how to access the code. Additionally, the reference of Brienen et al. 2014 is unfortunately not part of the reference list.

*Response: Thank you for your comment. We will include a section about code availability and provide information on how to access the model codes. We will include the reference to Brienen et al. 2014 in the reference list.*
